# Supplementary material for: Total glycerol analysis in biodiesel samples using solid phase extraction coupled with enzymatic-spectrophotometric determination
Source: Royal Society of Chemistry journal article supplement (doi:10.1039/c8ay02736f), 2019-01-01
Supplement: c8ay02736f1.pdf [file c8ay02736f1.pdf]

## Supplementary Material

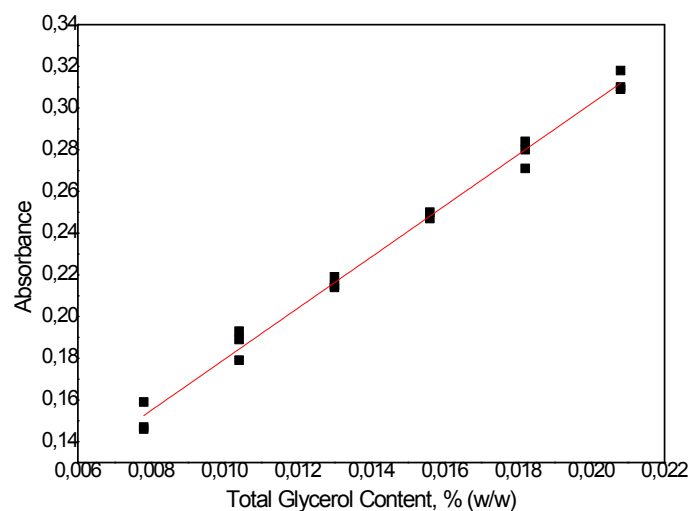

**Fig. S1.** Analytical curve obtained for glycerol standards in 4 mL of the commercial enzymatic kit ranging from 0.0078 to 0.0208% w/w.

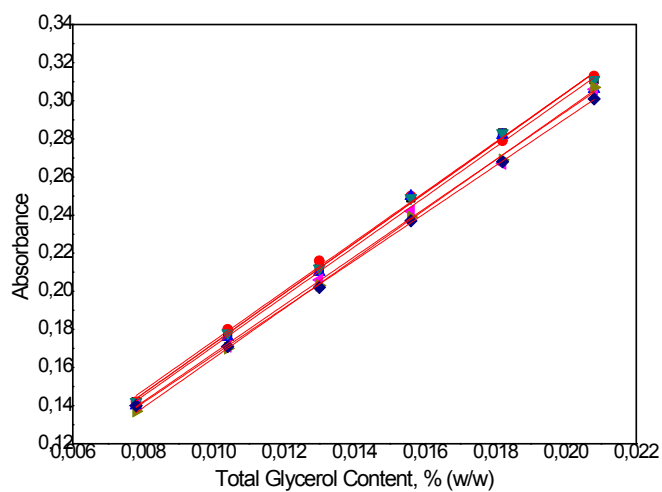

**Fig. S2.** Evaluation of the intermediate precision through several analytical curves plotted on different days, two lots of the enzymatic kit and different.
